# Supplementary figures and images for: First-passage fingerprints of water diffusion near glutamine surfaces
Source: Royal Society of Chemistry journal article supplement (doi:10.1039/d0sm00541j), 2020-01-01

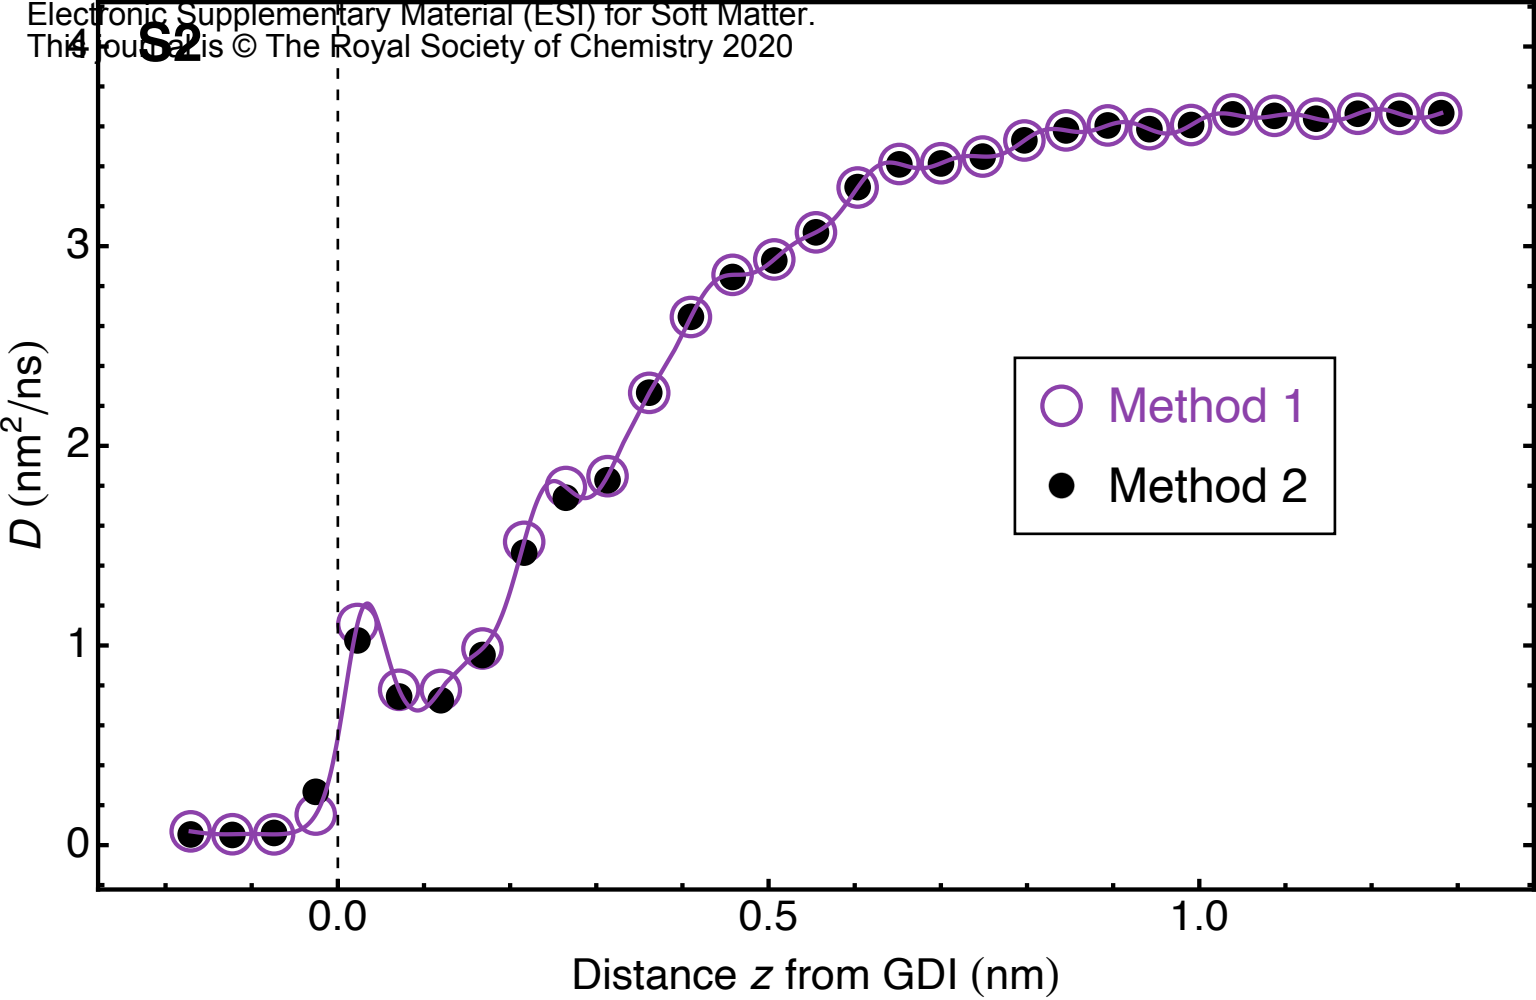

Supplement: d0sm00541j10.pdf [file d0sm00541j10.pdf]

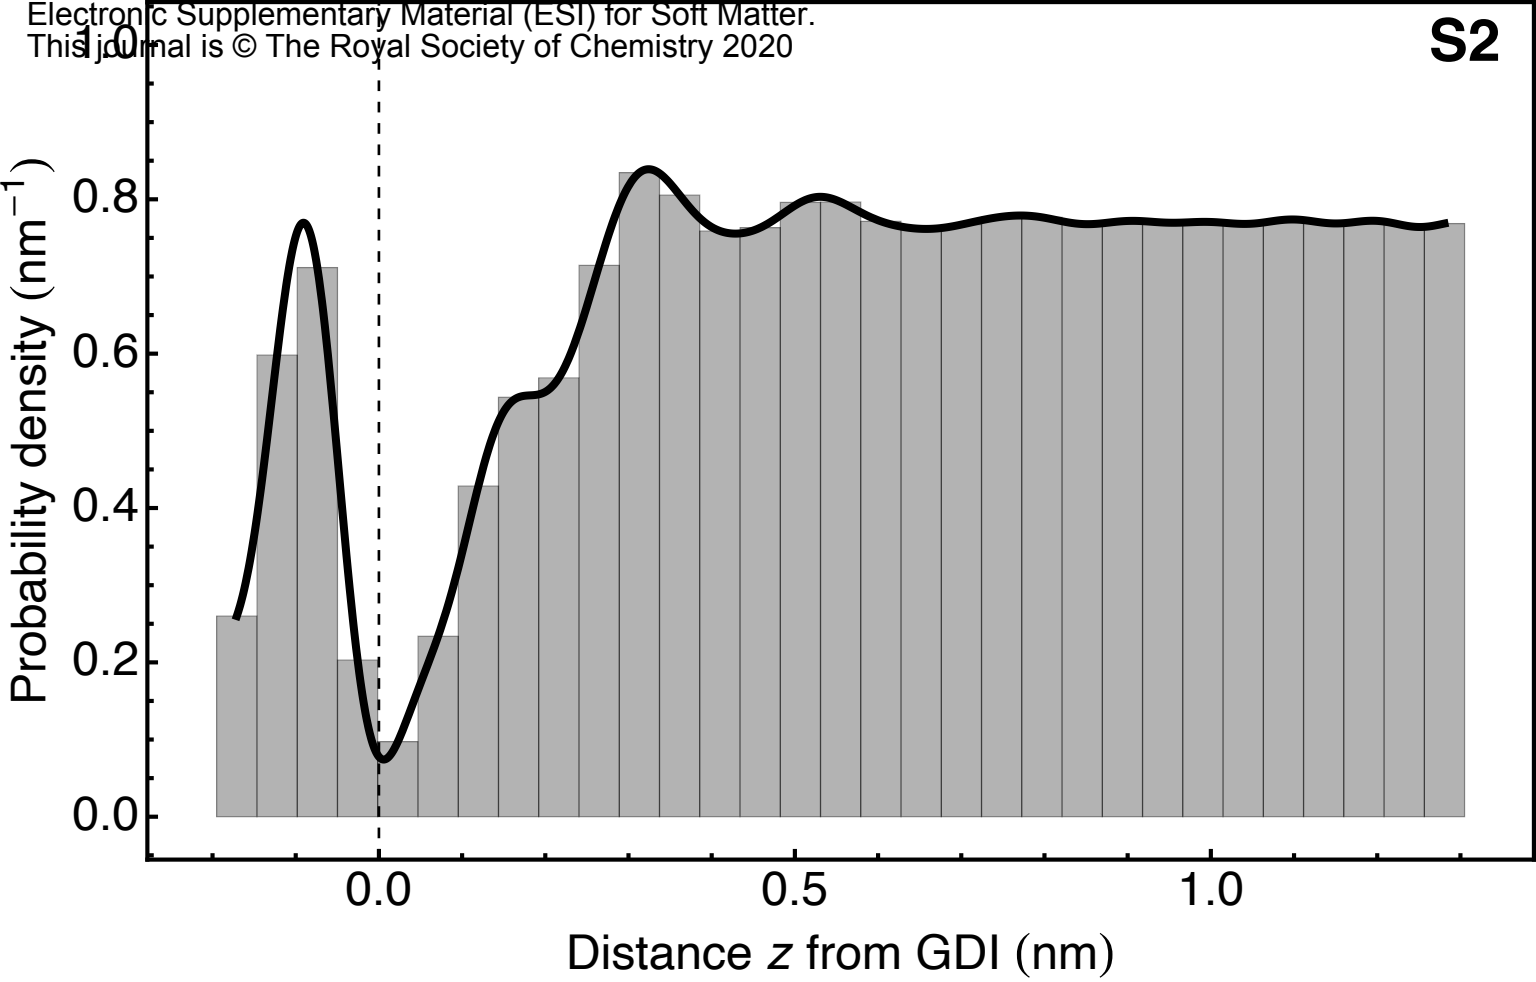

Supplement: d0sm00541j12.pdf [file d0sm00541j12.pdf]

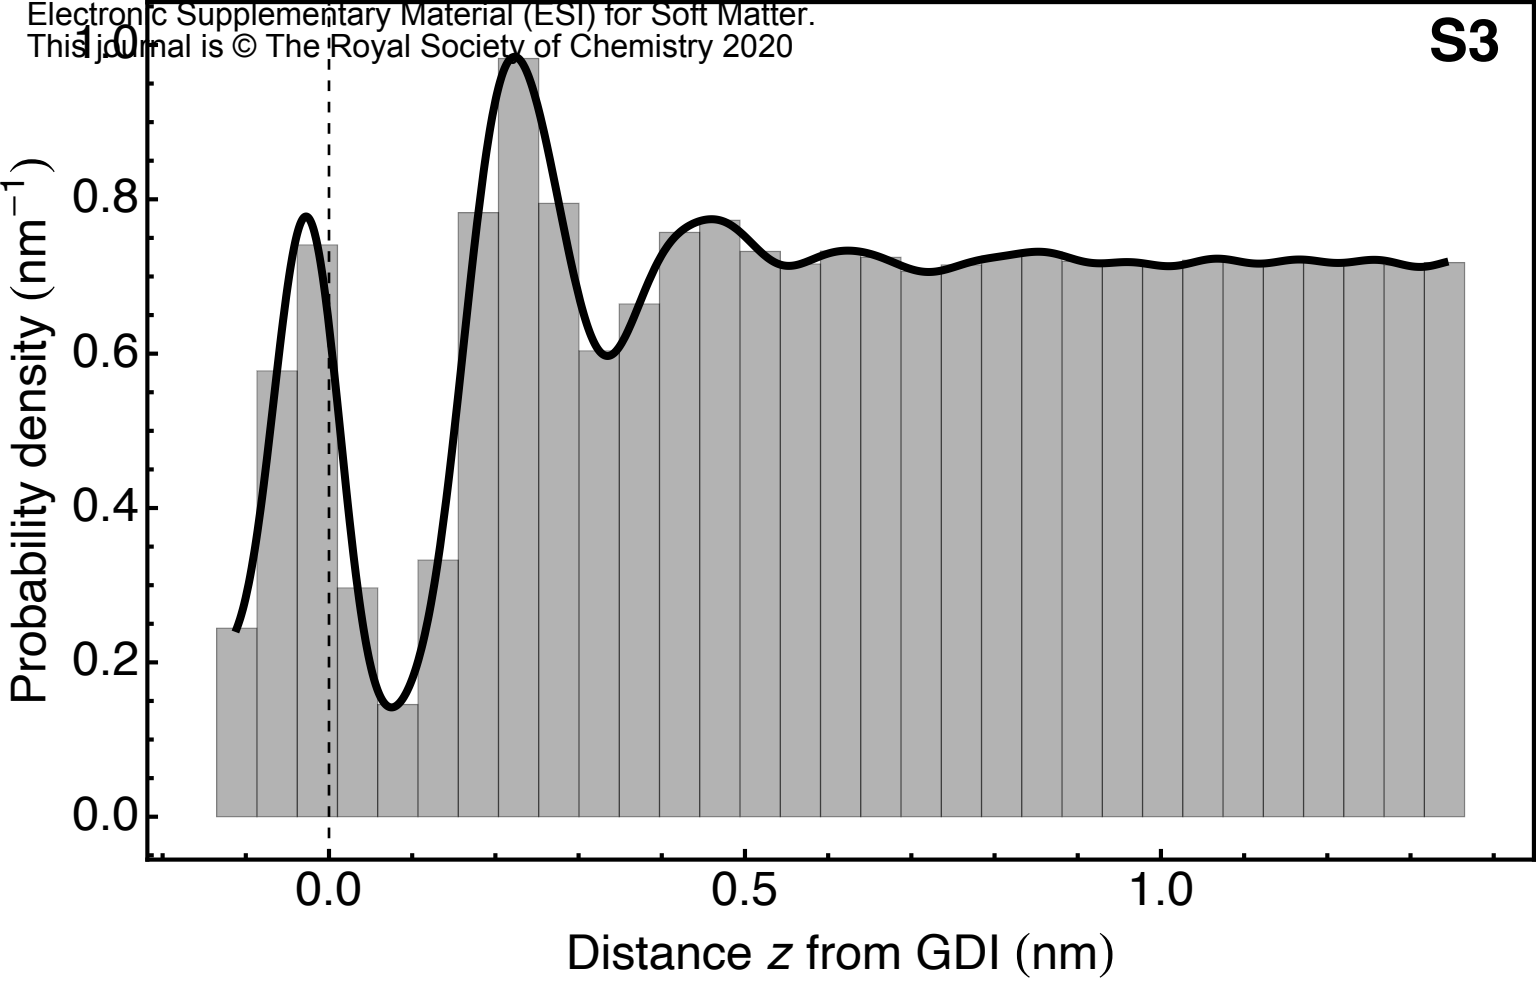

Supplement: d0sm00541j17.pdf [file d0sm00541j17.pdf]

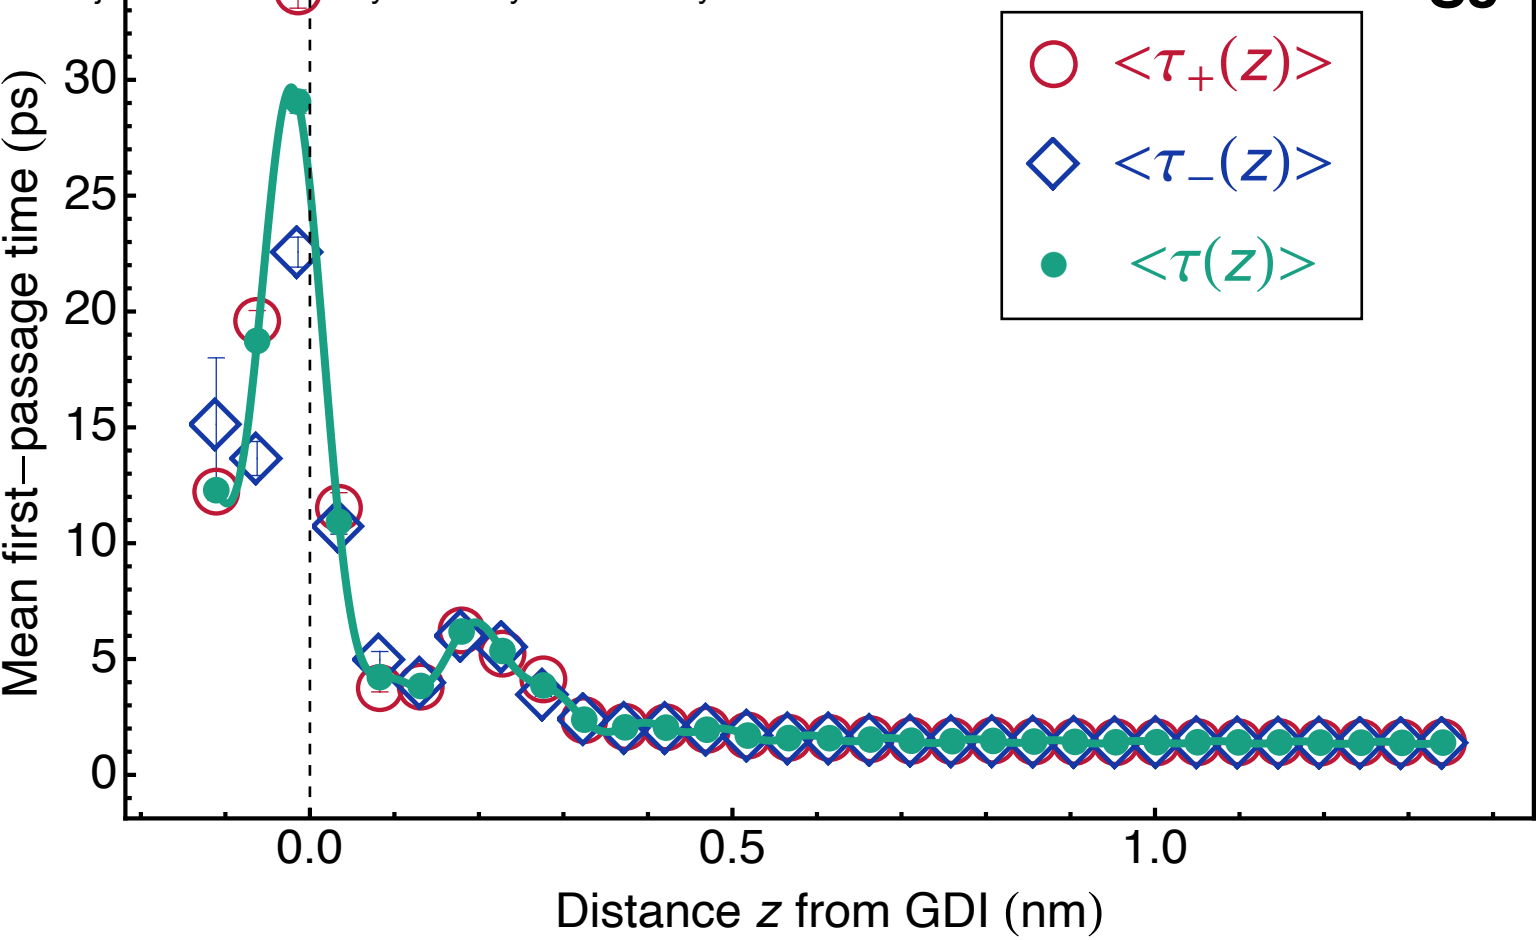

Supplement: d0sm00541j19.pdf [file d0sm00541j19.pdf]

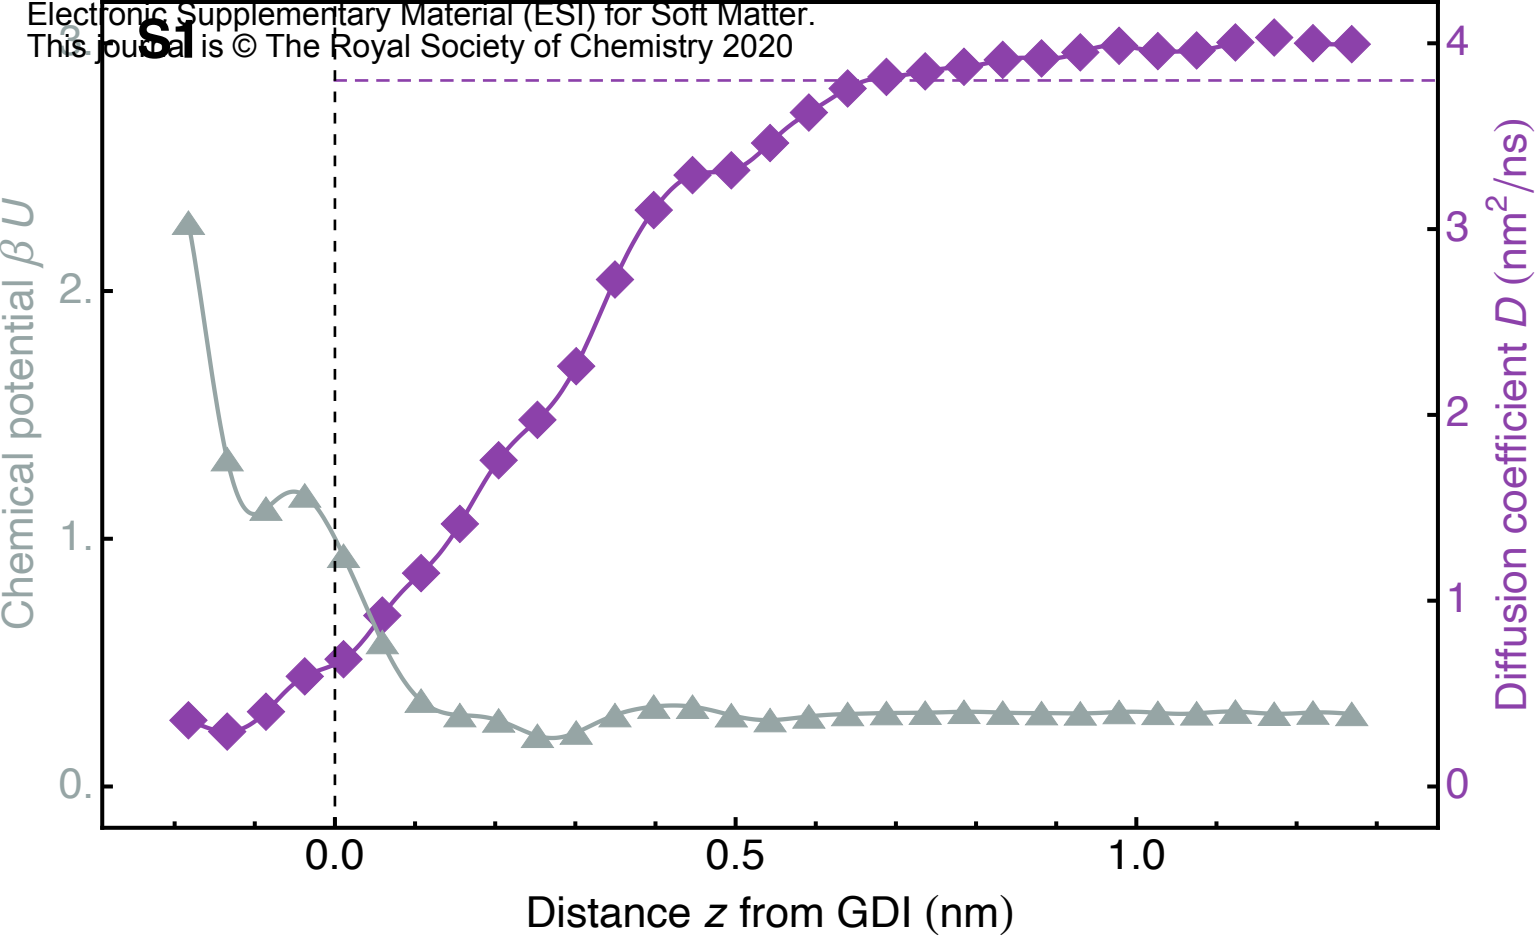

Supplement: d0sm00541j3.pdf [file d0sm00541j3.pdf]

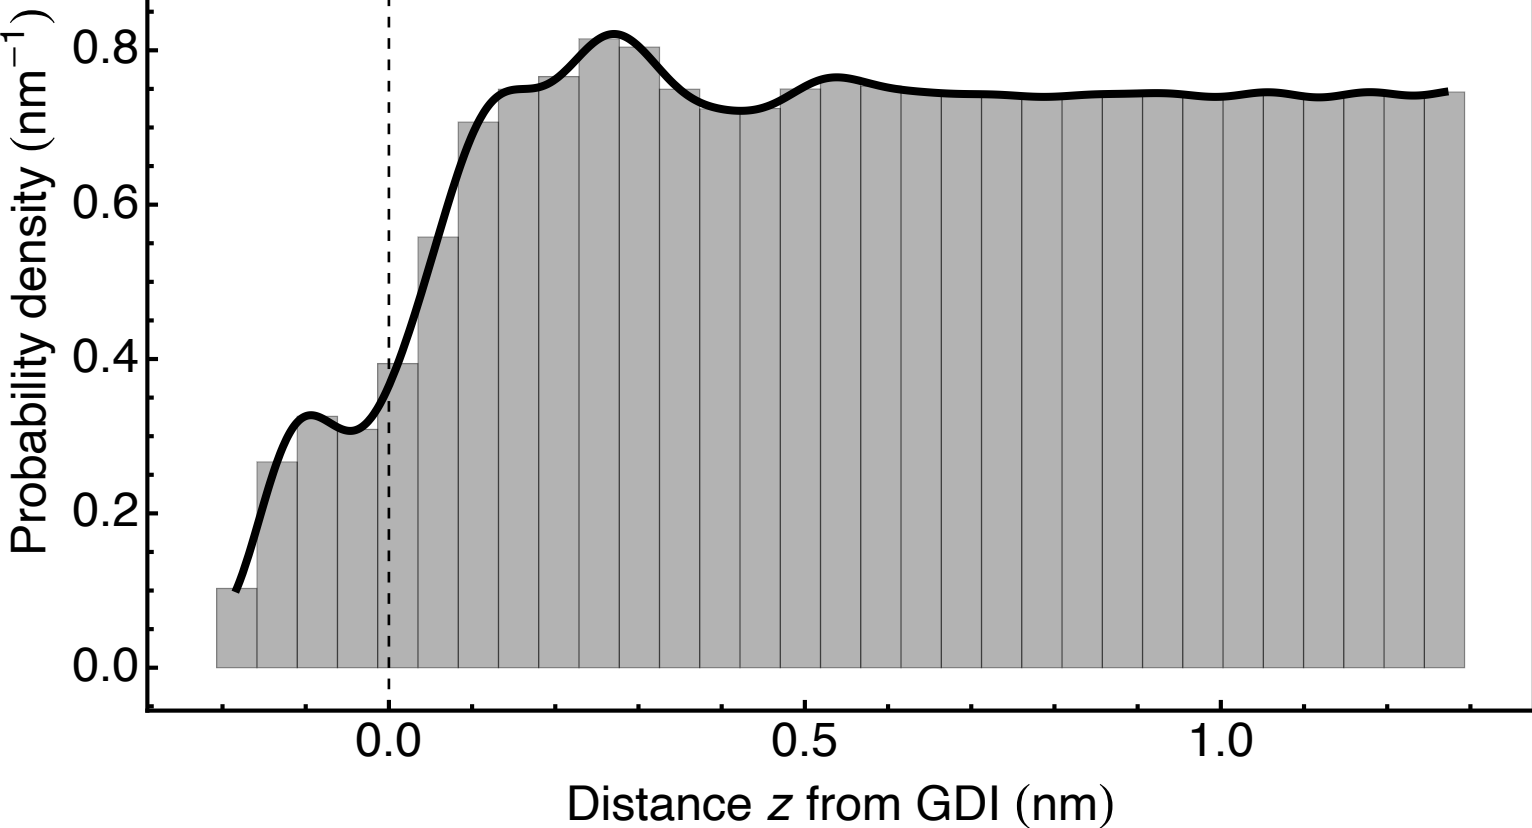

Supplement: d0sm00541j6.pdf [file d0sm00541j6.pdf]

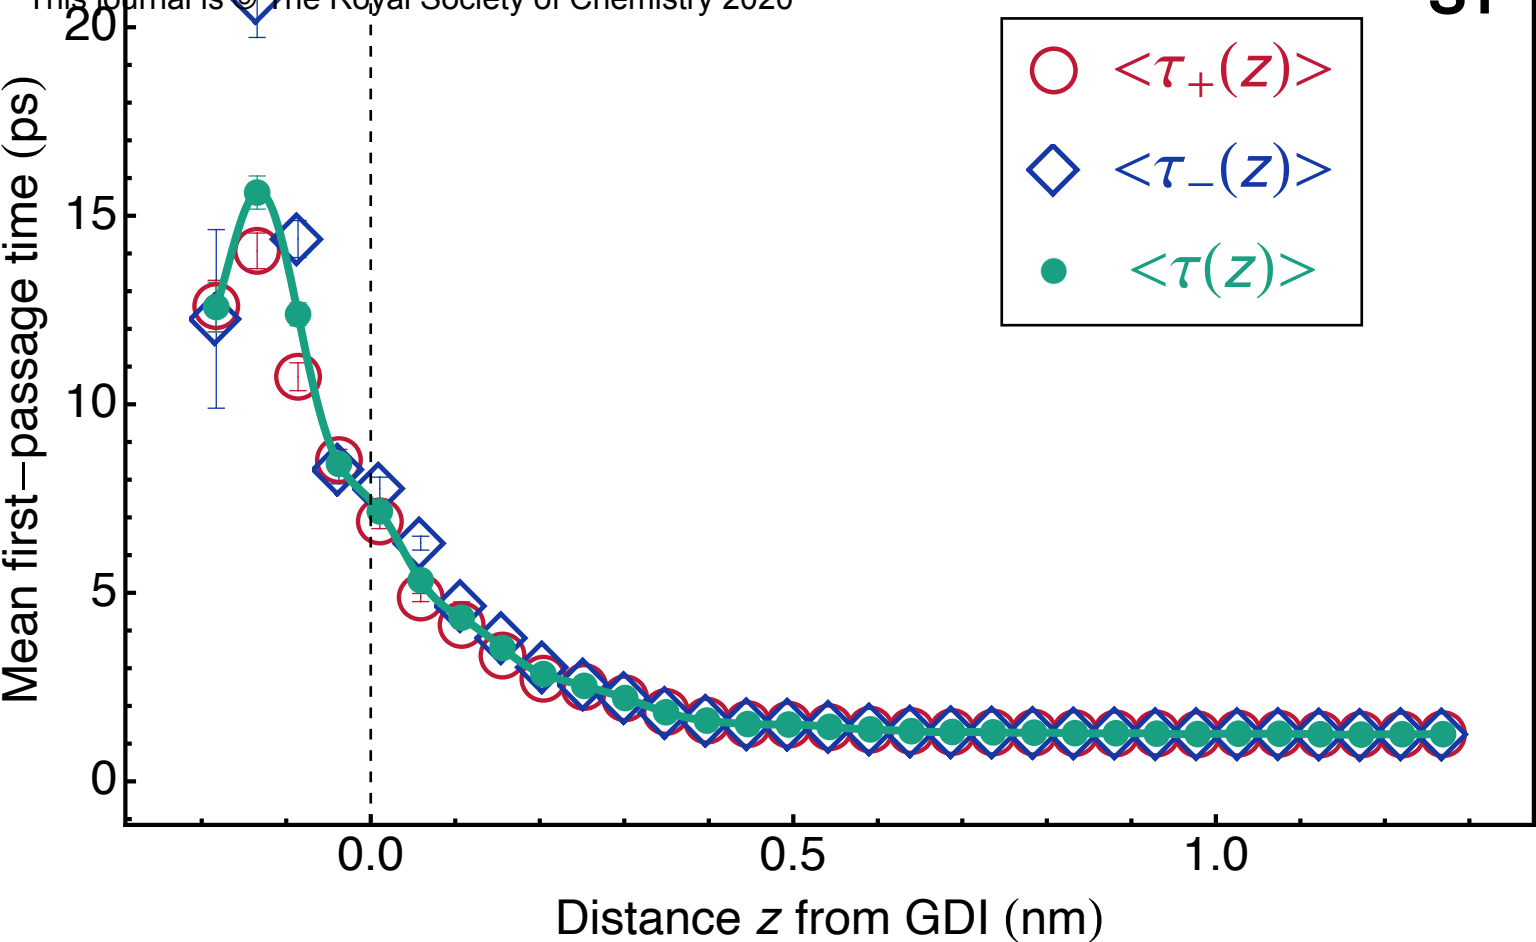

Supplement: d0sm00541j8.pdf [file d0sm00541j8.pdf]

S2

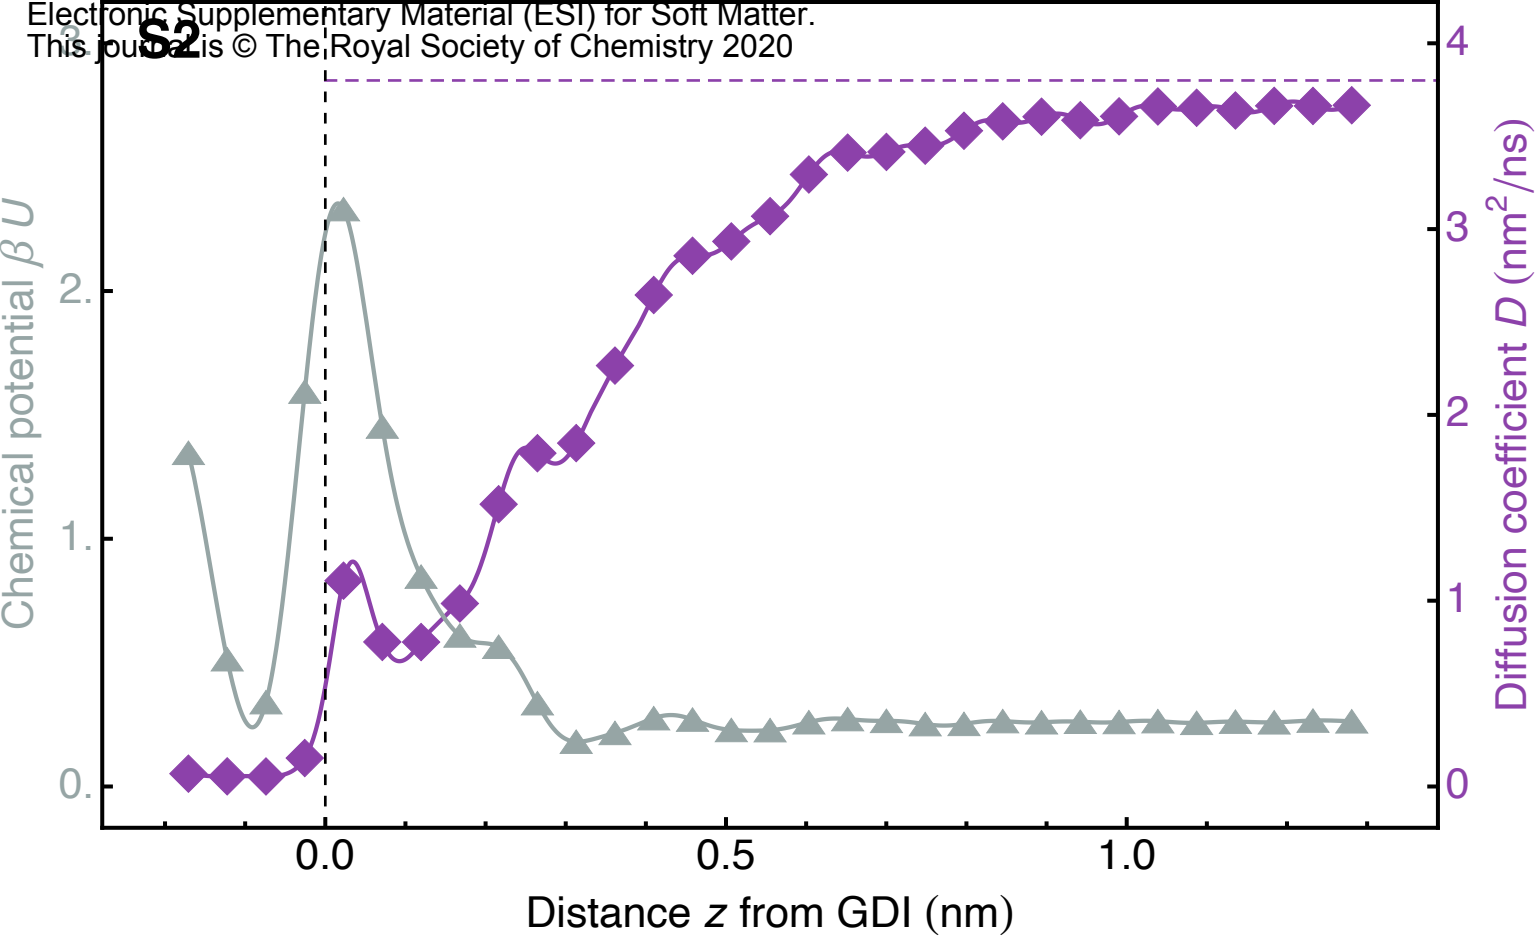

Supplement: d0sm00541j9.pdf [file d0sm00541j9.pdf]
